# Supplementary material for: Association of circulating free and total oxysterols in breast cancer patients
Source: publisher site journal article supplement (doi:10.1515/cclm-2022-0705), 2022-11-07
Supplement: Supplementary file 2 [file j_cclm-2022-0705_suppl_002.docx]

**Supplementary Table 1**: Limit of detection (LOD) and detected concentration values (range) of total and free oxysterols

|  | **Total oxysterols (nM)** | | **Free oxysterols (nM)** | |
| --- | --- | --- | --- | --- |
|  | **LOD** | **Detected values (range)** | **LOD** | **Detected values (range)** |
| 27-HC | 3.6 | 151.0-344.0 | 2.2 | 3.2-70.1 |
| 25-HC | 5.0 | 5.6-19.0 | 2.5 | 4.3-31.7 |
| 24S-HC | 10.0 | 39.2-211.0 | 2.7 | 3.0-42.2 |
| 22R-HC | 0.70 | < LOD | 0.60 | 5.3-12.2 |
| 5a6a-EC | 1.00 | 16.6-79.4 | 0.50 | 6.6-44.1 |
| 5b6b-EC | 5.79 | 56.6-402.0 | 0.40 | 26.7- 256.0 |
| 7-KC | 2.20 | 39.1-1570.0 | 0.90 | 9.2-285.0 |
| 7a-HC | 3.2 | 95.5-762.0 | 1.4 | 15.7-226.0 |
| 7b-HC | 2.4 | 11.0-733.0 | 1.2 | 9.7-247.0 |
| Lan | 8.19 | 281.0-1640.0 | 0.90 | 208.0-1180.0 |
| 24-DHLan | 2.4 | 5.1-79.7 | 2.2 | 29.9-99.2 |
| 7-DC | 3.5 | 544.0-3420.0 | 6.6 | 218.0-2550.0 |
| Desmos | 4.6 | 480.0-3160.0 | 3.4 | 18.7-1120.0 |
| 24,25-EC | 6.7 | < LOD | 9.8 | < LOD |
| THC | 3.30 | 3.4-10.9 | 3.10 | < LOD |
| 4b-HC | - | Not measured | 3.6 | 26.4-234.0 |
| C4(7a) | - | Not measured | 0.40 | 2.3-113.0 |

Detected values presented as range (min, max) in nanomolar (nM). Abbreviations: 27-HC, 27-hydroxycholesterol; 25-HC, 25-hydroxycholesterol; 24S-HC, 24S-hydroxycholesterol; 22R-HC, 22R-hydroxycholesterol; 5a6a-EC, 5α,6α-epoxycholesterol; 5b6b-EC, 5β,6β-epoxycholesterol; 7-KC, 7-ketocholesterol; 7a-HC, 7α-hydroxycholesterol; 7b-HC, 7β-hydroxycholesterol; Lan, lanosterol; 24-DHLan, 24,25-dihydrolanosterol; 7-DC, 7-dehydrocholesterol; Desmos, desmosterol; 24,25-EC, 24,25-epoxycholesterol; THC, 5α,6β-dihydroxycholestanol; 4b-HC, 4β-hydroxycholesterol; C4(7a), 7α-hydroxycholestenone; LOD, limit of detection
